# Supplementary material for: Molecular Physiological Evidence for the Role of Na+-Cl− Co-Transporter in Branchial Na+ Uptake in Freshwater Teleosts
Source: MDPI journal article supplement (doi:10.3390/ijms24076597), 2023-04-01
Supplement: s1 [file s1]

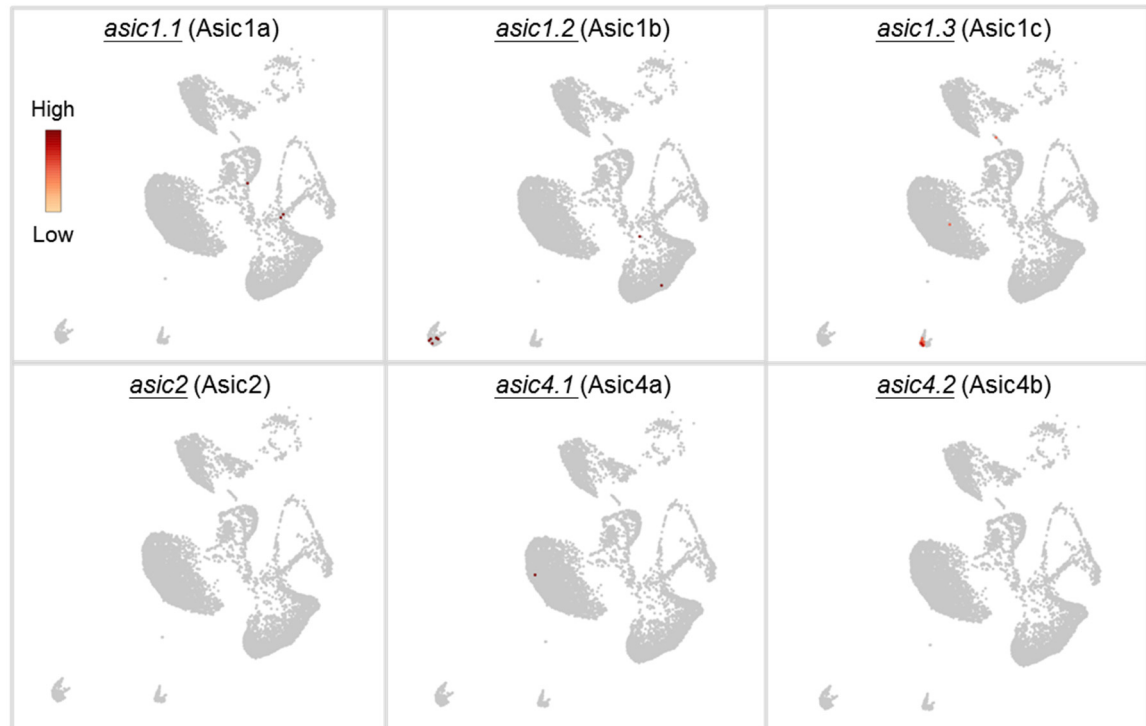

**Figure S5.** The expression of paralogs of *asic* on the UMAP in the gills of adult zebrafish. The UMAP shows the distribution and expression of *asic1.1* (Acid-sensing ion channel 1a, Asic1a), *asic1.2* (Asic1b), *asic1.3* (Asic1c), *asic2* (Asic2), *asic4.1* (Asic4a), and *asic4.2* (Asic4b) in gill cells of adult zebrafish.
