# Supplementary material for: Molecular Physiological Evidence for the Role of Na+-Cl− Co-Transporter in Branchial Na+ Uptake in Freshwater Teleosts
Source: MDPI journal article supplement (doi:10.3390/ijms24076597), 2023-04-01
Supplement: s1 [file s1]

(a)

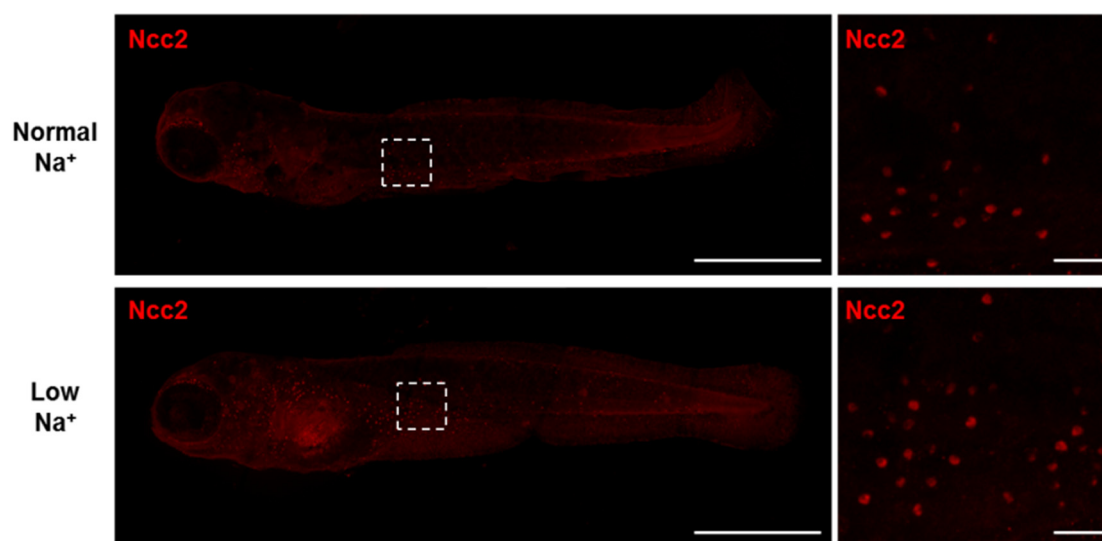

(b)

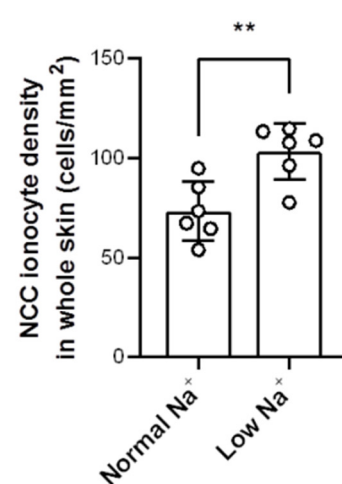

**Figure S4.** Effects of low-Na<sup>+</sup> acclimation on the number of NCC ionocytes in the skin of 4 days post-fertilization (dpf) larval zebrafish. After acclimation to low-Na<sup>+</sup> FW, NCC ionocytes in the whole skin of 4 dpf larvae were stained using IF. The right panels (scale bar, 50  $\mu$ m) show enlargements of the indicated areas (white dashed frames) in the left panels (scale bar, 500  $\mu$ m) (a). Cell density of NCC ionocytes was calculated and shown (b). Values are the mean  $\pm$  SD (N=6). Student's *t*-test, \*\*  $p < 0.01$ .
