# Supplementary material for: Molecular Physiological Evidence for the Role of Na+-Cl− Co-Transporter in Branchial Na+ Uptake in Freshwater Teleosts
Source: MDPI journal article supplement (doi:10.3390/ijms24076597), 2023-04-01
Supplement: s1 [file s1]

**Table S1.** Ion concentration of artificial normal- and low- $\text{Na}^+$  FW.

|                          | $\text{Na}^+$<br>(mM) | $\text{Cl}^-$<br>(mM) | $\text{K}^+$<br>(mM) | $\text{Mg}^{2+}$<br>(mM) | $\text{Ca}^{2+}$<br>(mM) |
|--------------------------|-----------------------|-----------------------|----------------------|--------------------------|--------------------------|
| Normal- $\text{Na}^+$ FW | 0.5                   | 0.2                   | 0.24                 | 0.2                      | 0.2                      |
| Low- $\text{Na}^+$ FW    | 0.001                 | 0.2                   | 0.24                 | 0.2                      | 0.2                      |
