# Supplementary material for: Molecular Physiological Evidence for the Role of Na+-Cl− Co-Transporter in Branchial Na+ Uptake in Freshwater Teleosts
Source: MDPI journal article supplement (doi:10.3390/ijms24076597), 2023-04-01
Supplement: s1 [file s1]

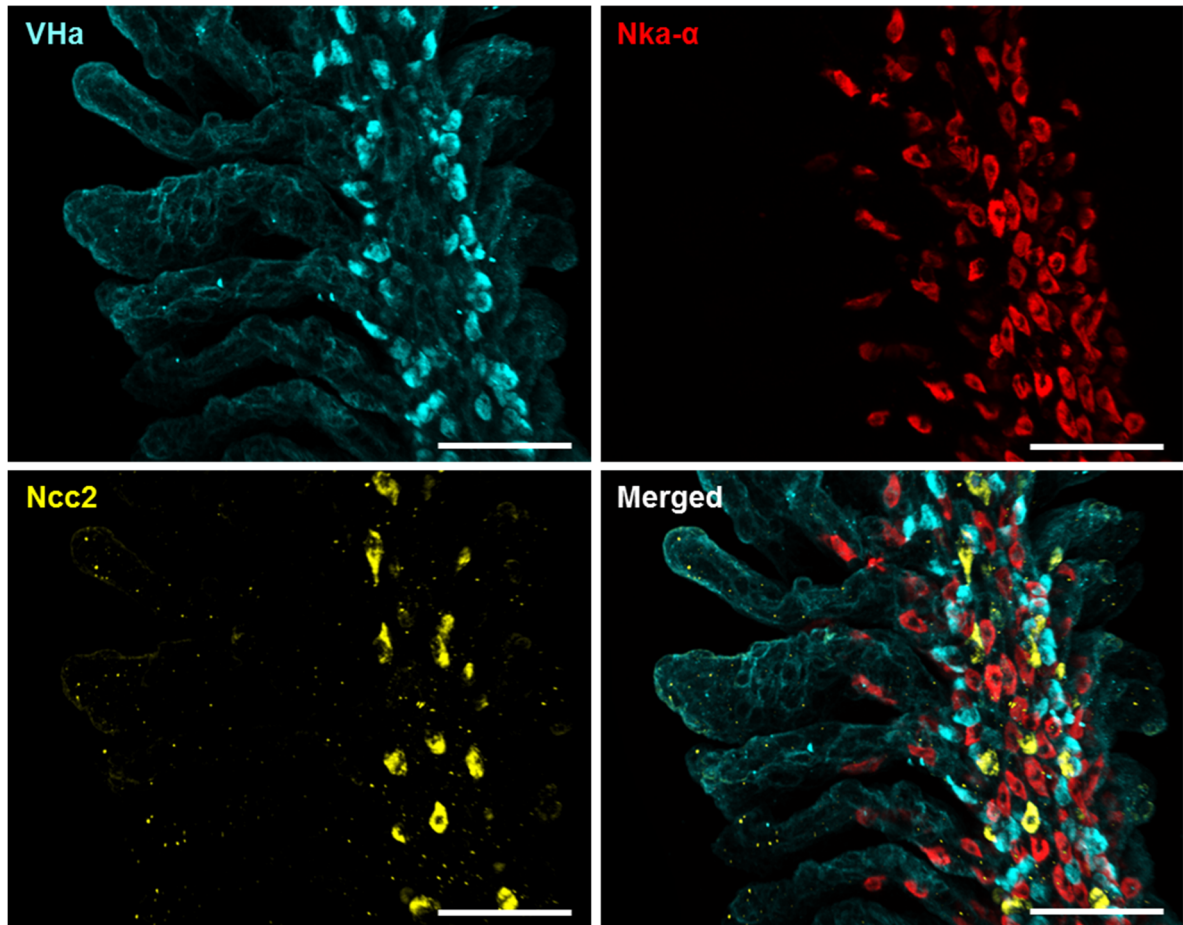

**Figure S2.** Localization of three subtypes of ionocytes in the gills of adult zebrafish. A different angle of Figure 2 is shown. Scale bar, 50  $\mu\text{m}$ .
