# Supplementary material for: Molecular Physiological Evidence for the Role of Na+-Cl− Co-Transporter in Branchial Na+ Uptake in Freshwater Teleosts
Source: MDPI journal article supplement (doi:10.3390/ijms24076597), 2023-04-01
Supplement: s1 [file s1]

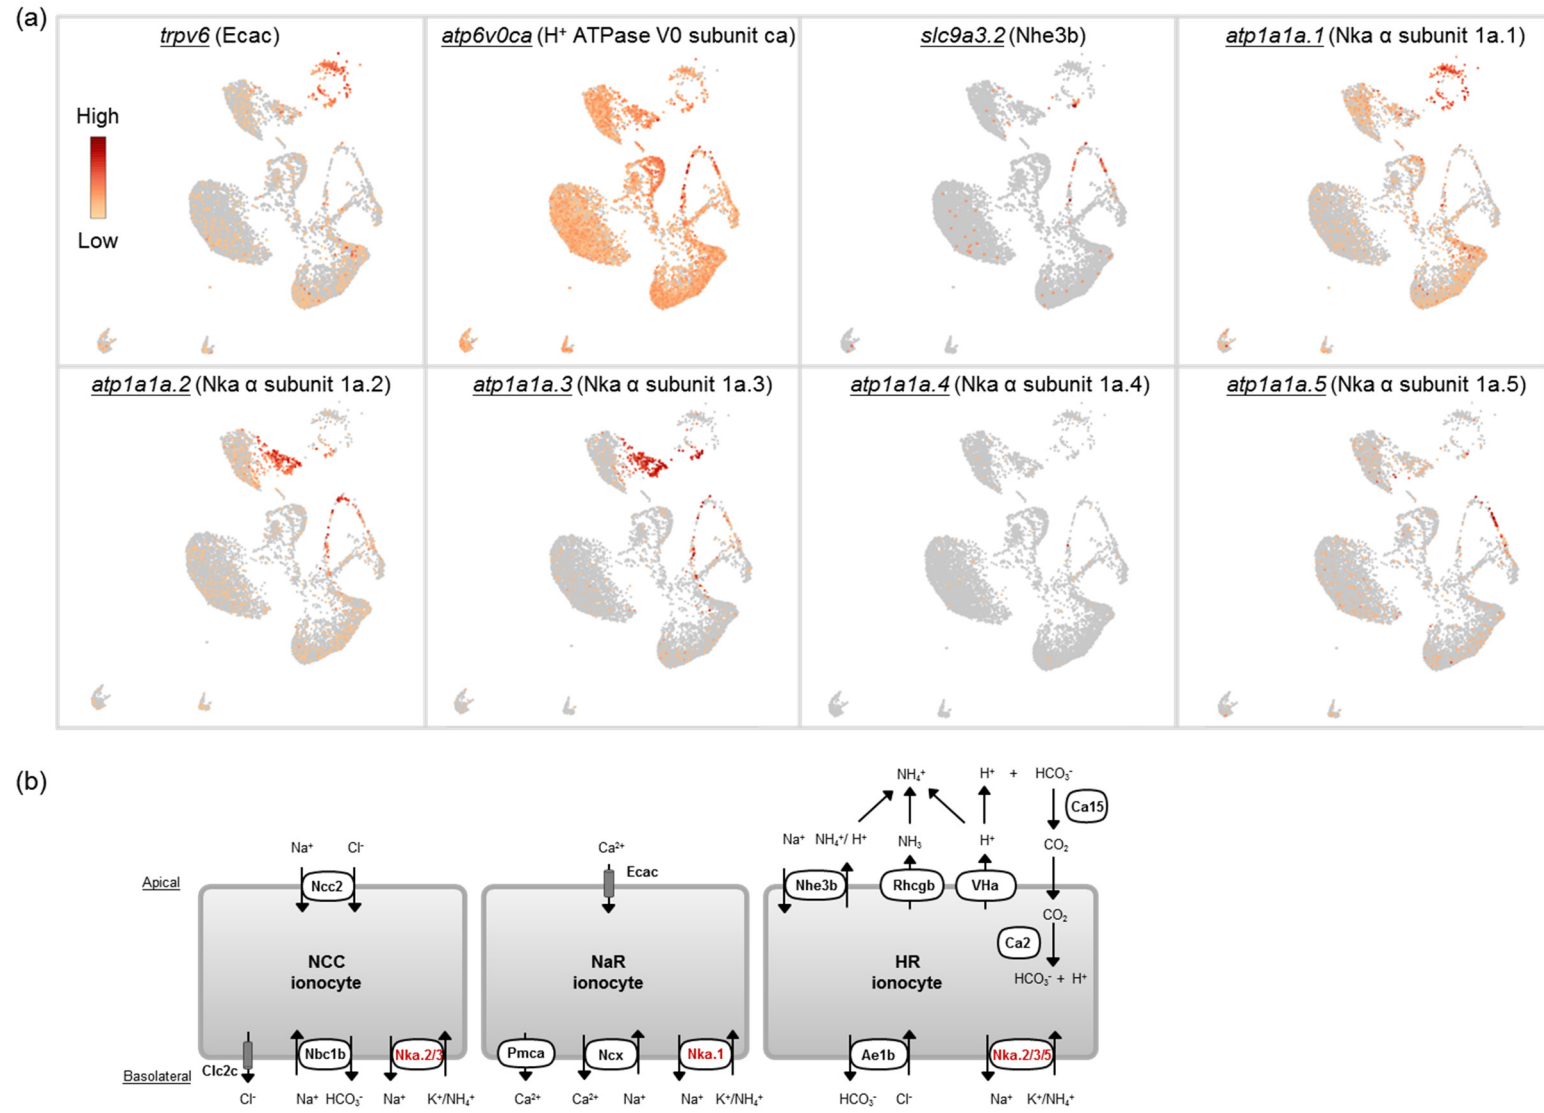

**Figure S1.** The expression of selected genes on the UMAP and newly-proposed ionocyte model in the gill cells of adult zebrafish. The UMAP shows the distribution and expression of *trpv6* (epithelial  $\text{Ca}^{2+}$  channel, Ecac), *atp6v0ca* ( $\text{H}^+$  ATPase V0 subunit ca), *slc9a3.2* ( $\text{Na}^+/\text{H}^+$  exchanger 3b, Nhe3b), *atp1a1a.1* (Nka  $\alpha$  subunit 1a.1), *atp1a1a.2* (Nka  $\alpha$  subunit 1a.2), *atp1a1a.3* (Nka  $\alpha$  subunit 1a.3), *atp1a1a.4* (Nka  $\alpha$  subunit 1a.4), and *atp1a1a.5* (Nka  $\alpha$  subunit 1a.5) in zebrafish gill cells (a). Newly-proposed ionocyte model of zebrafish is shown (b), which summarizes the findings in (a). Ae1b, anion exchanger 1b; Ca2, cytosolic carbonic anhydrase 2; Ca15, membrane-bound carbonic anhydrase 15; Clc2c, chloride channel 2c; Nbc1b,  $\text{Na}^+/\text{HCO}_3^-$  co-transporter 1b; Ncc2,  $\text{Na}^+/\text{Cl}^-$  co-transporter 2; Ncx,  $\text{Na}^+/\text{Ca}^{2+}$  exchanger; Nka.1~.5, Nka  $\alpha$  subunit 1a.1~1a.5; Pmca, plasma membrane  $\text{Ca}^{2+}$  ATPase; Rhcgb, rhesus C glycoprotein b; VHa, vascular-type  $\text{H}^+$  ATPase.
