# Supplementary material for: Molecular Physiological Evidence for the Role of Na+-Cl− Co-Transporter in Branchial Na+ Uptake in Freshwater Teleosts
Source: MDPI journal article supplement (doi:10.3390/ijms24076597), 2023-04-01
Supplement: s1 [file s1]

**Table S2.** Primer sets used for quantitative real-time polymerase chain reaction (qRT-PCR).

| Gene name         | Accession number | Sequence (5' to 3') |                         | Primer efficiency |
|-------------------|------------------|---------------------|-------------------------|-------------------|
| <i>rpl13a</i>     | NM_212784        | Forward             | CCTCGGTCGTCTTTCCGCTATTG | 95.2%             |
|                   |                  | Reverse             | CAGCCTGACCCCTCTTGGTTTTG |                   |
| <i>slc12a10.2</i> | NM_001045001     | Forward             | GCCCCCAAAGTTTTCCAGTT    | 95.9%             |
|                   |                  | Reverse             | TAAGCACGAAGAGGCTCCTTG   |                   |
