# Supplementary material for: Molecular Physiological Evidence for the Role of Na+-Cl− Co-Transporter in Branchial Na+ Uptake in Freshwater Teleosts
Source: MDPI journal article supplement (doi:10.3390/ijms24076597), 2023-04-01
Supplement: s1 [file s1]

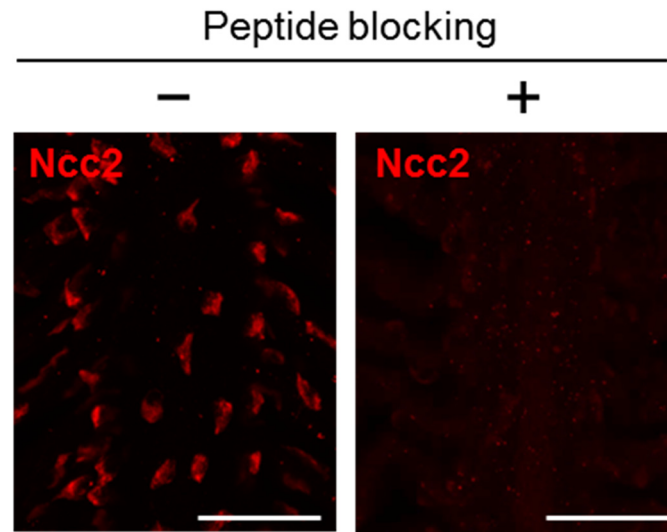

**Figure S3.** Examination of the specificity of Ncc2 antibody in zebrafish gills. The gills stained by Ncc2 antibody pre-incubated with (+) or without (–) synthetic Ncc2 peptide were shown by whole-mount IF. Scale bar, 50  $\mu$ m.
